# Supplementary material for: Pandoravirus Celtis Illustrates the Microevolution Processes at Work in the Giant Pandoraviridae Genomes
Source: PubMed Central journal article supplement (PMC6418002; doi:10.3389/fmicb.2019.00430), 2019-03-08

**Supplementary Table S1.** Predicted non-coding RNAs (ncRNAs)

| <i>P. celtis</i><br>gene # | Length<br>(nt) | <i>P. quercus</i> homolog<br>gene # | %<br>identity | %<br>overlap | BlastN<br>E-value | Median RNAseq<br>Read coverage |
|----------------------------|----------------|-------------------------------------|---------------|--------------|-------------------|--------------------------------|
| pclt_ncRNA_138             | 647            | pqer_ncRNA_139                      | 100           | 100          | 0                 | 457                            |
| pclt_ncRNA_31              | 1432           | pqer_ncRNA_42                       | 100           | 100          | 0                 | 453                            |
| pclt_ncRNA_137             | 1750           | pqer_ncRNA_138                      | 99.9          | 100          | 0                 | 605                            |
| pclt_ncRNA_101             | 1041           | pqer_ncRNA_104                      | 99.8          | 100          | 0                 | 420                            |
| pclt_ncRNA_92              | 585            | pqer_ncRNA_95                       | 98.1          | 100          | 0                 | 567                            |
| pclt_ncRNA_149             | 968            | pqer_ncRNA_145                      | 97.9          | 100          | 0                 | 569                            |
| pclt_ncRNA_146             | 1707           | pqer_ncRNA_144                      | 97.7          | 100          | 0                 | 381                            |
| pclt_ncRNA_18              | 1416           | pqer_ncRNA_24                       | 96.9          | 100          | 0                 | 389                            |
| pclt_ncRNA_60              | 1223           | pqer_ncRNA_68                       | 96.7          | 100          | 0                 | 359                            |
| pclt_ncRNA_83              | 1259           | pqer_ncRNA_82                       | 95.1          | 100          | 0                 | 226                            |
| pclt_ncRNA_28              | 1362           | pqer_ncRNA_39                       | 99.1          | 99.7         | 0                 | 376                            |
| pclt_ncRNA_155             | 1997           | pqer_ncRNA_149                      | 99.8          | 99.6         | 0                 | 733                            |
| pclt_ncRNA_144             | 648            | pqer_ncRNA_142                      | 96.9          | 99.5         | 0                 | 717                            |
| pclt_ncRNA_109             | 2468           | pqer_ncRNA_112                      | 100           | 99.4         | 0                 | 394                            |
| pclt_ncRNA_133             | 4456           | pqer_ncRNA_134                      | 97.2          | 99.3         | 0                 | 354                            |
| pclt_ncRNA_150             | 2157           | pqer_ncRNA_146                      | 100           | 99.1         | 0                 | 395                            |
| pclt_ncRNA_100             | 1363           | pqer_ncRNA_103                      | 100           | 99.0         | 0                 | 995                            |
| pclt_ncRNA_65              | 813            | pqer_ncRNA_70                       | 100           | 99.0         | 0                 | 253                            |
| pclt_ncRNA_30              | 735            | pqer_ncRNA_40                       | 97            | 98.9         | 0                 | 324                            |
| pclt_ncRNA_153             | 1504           | pqer_ncRNA_148                      | 100           | 98.7         | 0                 | 231                            |
| pclt_ncRNA_113             | 1576           | pqer_ncRNA_117                      | 94            | 98.7         | 0                 | 540                            |
| pclt_ncRNA_77              | 854            | pqer_ncRNA_80                       | 100           | 98.6         | 0                 | 475                            |
| pclt_ncRNA_16              | 1651           | pqer_ncRNA_21                       | 97.4          | 97.8         | 0                 | 541                            |
| pclt_ncRNA_159             | 1587           | pqer_ncRNA_153                      | 97            | 97.8         | 0                 | 263                            |
| pclt_ncRNA_4               | 1467           | pqer_ncRNA_6                        | 98.4          | 97.7         | 0                 | 737                            |
| pclt_ncRNA_106             | 3617           | pqer_ncRNA_109                      | 98.1          | 97.6         | 0                 | 336                            |
| pclt_ncRNA_5               | 1758           | pqer_ncRNA_7                        | 97.9          | 97.6         | 0                 | 362                            |
| pclt_ncRNA_121             | 2235           | pqer_ncRNA_127                      | 97.1          | 96.6         | 0                 | 358                            |
| pclt_ncRNA_24              | 2177           | pqer_ncRNA_35                       | 100           | 95.7         | 0                 | 396                            |
| pclt_ncRNA_72              | 1652           | pqer_ncRNA_73                       | 99.4          | 95.0         | 0                 | 283                            |
| pclt_ncRNA_34              | 1089           | pqer_ncRNA_43                       | 95.2          | 94.9         | 0                 | 129                            |
| pclt_ncRNA_152             | 2018           | pqer_ncRNA_147                      | 100           | 94.9         | 0                 | 299                            |
| pclt_ncRNA_41              | 1547           | pqer_ncRNA_49                       | 99.9          | 94.6         | 0                 | 478                            |
| pclt_ncRNA_145             | 2158           | pqer_ncRNA_143                      | 95            | 94.3         | 0                 | 142                            |
| pclt_ncRNA_13              | 2246           | pqer_ncRNA_14                       | 95.4          | 93.5         | 0                 | 151                            |
| pclt_ncRNA_9               | 1912           | pqer_ncRNA_11                       | 99.8          | 93.4         | 0                 | 388                            |
| pclt_ncRNA_98              | 1956           | pqer_ncRNA_99                       | 98            | 93.3         | 0                 | 431                            |
| pclt_ncRNA_6               | 1281           | pqer_ncRNA_8                        | 99.4          | 92.3         | 0                 | 260                            |
| pclt_ncRNA_143             | 1580           | pqer_ncRNA_140                      | 99.7          | 91.8         | 0                 | 517                            |
| pclt_ncRNA_78              | 1415           | pqer_ncRNA_81                       | 100           | 91.8         | 0                 | 268                            |

|                |      |                |      |      |                     |      |
|----------------|------|----------------|------|------|---------------------|------|
| pclt_ncRNA_7   | 659  | pqer_ncRNA_9   | 96.3 | 91.0 | 0                   | 279  |
| pclt_ncRNA_10  | 961  | pqer_ncRNA_13  | 96.2 | 90.9 | 0                   | 304  |
| pclt_ncRNA_90  | 1813 | pqer_ncRNA_89  | 99.9 | 89.0 | 0                   | 238  |
| pclt_ncRNA_129 | 1198 | pqer_ncRNA_131 | 100  | 87.2 | 0                   | 404  |
| pclt_ncRNA_91  | 921  | pqer_ncRNA_91  | 100  | 86.3 | 0                   | 292  |
| pclt_ncRNA_97  | 1253 | pqer_ncRNA_98  | 95.4 | 85.9 | 0                   | 116  |
| pclt_ncRNA_156 | 1369 | pqer_ncRNA_150 | 99.1 | 85.8 | 0                   | 211  |
| pclt_ncRNA_53  | 873  | pqer_ncRNA_62  | 99.6 | 85.3 | 0                   | 524  |
| pclt_ncRNA_125 | 907  | pqer_ncRNA_130 | 95.2 | 84.8 | 0                   | 402  |
| pclt_ncRNA_161 | 1748 | pqer_ncRNA_157 | 98.1 | 84.4 | 0                   | 262  |
| pclt_ncRNA_89  | 1706 | pqer_ncRNA_88  | 98   | 84.3 | 0                   | 588  |
| pclt_ncRNA_116 | 1731 | pqer_ncRNA_121 | 99.7 | 84.3 | 0                   | 350  |
| pclt_ncRNA_158 | 1329 | pqer_ncRNA_151 | 100  | 84.0 | 0                   | 218  |
| pclt_ncRNA_124 | 1090 | pqer_ncRNA_129 | 95.7 | 84.0 | 0                   | 461  |
| pclt_ncRNA_134 | 1155 | pqer_ncRNA_135 | 99.9 | 83.3 | 0                   | 791  |
| pclt_ncRNA_43  | 1966 | pqer_ncRNA_50  | 100  | 82.1 | 0                   | 1041 |
| pclt_ncRNA_20  | 556  | pqer_ncRNA_28  | 99.1 | 82.0 | 0                   | 733  |
| pclt_ncRNA_102 | 1539 | pqer_ncRNA_105 | 99.8 | 81.5 | 0                   | 294  |
| pclt_ncRNA_47  | 2129 | pqer_ncRNA_54  | 99.7 | 78.6 | 0                   | 219  |
| pclt_ncRNA_123 | 1141 | pqer_ncRNA_128 | 100  | 78.1 | 0                   | 512  |
| pclt_ncRNA_114 | 1287 | pqer_ncRNA_117 | 69.8 | 76.6 | <10 <sup>-119</sup> | 117  |
| pclt_ncRNA_59  | 2415 | pqer_ncRNA_67  | 98   | 75.0 | 0                   | 337  |
| pclt_ncRNA_104 | 1835 | pqer_ncRNA_107 | 99.9 | 74.7 | 0                   | 261  |
| pclt_ncRNA_112 | 1045 | pqer_ncRNA_116 | 71.2 | 73.9 | <10 <sup>-97</sup>  | 153  |
| pclt_ncRNA_58  | 779  | pqer_ncRNA_66  | 100  | 71.9 | 0                   | 177  |
| pclt_ncRNA_57  | 1335 | pqer_ncRNA_65  | 96.9 | 71.6 | 0                   | 770  |
| pclt_ncRNA_54  | 1035 | pqer_ncRNA_64  | 96.1 | 69.3 | 0                   | 311  |
| pclt_ncRNA_3   | 1728 | pqer_ncRNA_5   | 98.6 | 69.0 | 0                   | 771  |
| pclt_ncRNA_74  | 1930 | pqer_ncRNA_77  | 85.4 | 68.7 | 0                   | 278  |
| pclt_ncRNA_94  | 1478 | pqer_ncRNA_96  | 99   | 60.7 | 0                   | 655  |
| pclt_ncRNA_15  | 1715 | pqer_ncRNA_20  | 91   | 60.6 | 0                   | 376  |
| pclt_ncRNA_25  | 2986 | pqer_ncRNA_37  | 100  | 59.2 | 0                   | 142  |
| pclt_ncRNA_17  | 1359 | pqer_ncRNA_23  | 98.7 | 58.6 | 0                   | 153  |
| pclt_ncRNA_88  | 744  | pqer_ncRNA_87  | 100  | 58.2 | 0                   | 459  |
| pclt_ncRNA_23  | 793  | pqer_ncRNA_34  | 82.9 | 57.4 | <10 <sup>-142</sup> | 263  |
| pclt_ncRNA_45  | 2238 | pqer_ncRNA_52  | 99.9 | 53.4 | 0                   | 219  |
| pclt_ncRNA_67  | 1951 | pqer_ncRNA_71  | 100  | 52.4 | 0                   | 379  |
| pclt_ncRNA_46  | 1930 | pqer_ncRNA_53  | 100  | 50.9 | 0                   | 213  |
| pclt_ncRNA_105 | 2098 | pqer_ncRNA_108 | 98.5 | 50.5 | 0                   | 253  |
| pclt_ncRNA_120 | 1630 | pqer_ncRNA_124 | 95.1 | 49.9 | 0                   | 304  |
| pclt_ncRNA_14  | 1458 | pqer_ncRNA_15  | 98.3 | 44.8 | 0                   | 1608 |
| pclt_ncRNA_70  | 1331 | pqer_ncRNA_129 | 77.4 | 44.3 | <10 <sup>-126</sup> | 119  |
| pclt_ncRNA_103 | 1921 | pqer_ncRNA_106 | 97.2 | 29.7 | 0                   | 531  |
| pclt_ncRNA_36  | 2052 | pqer_ncRNA_46  | 100  | 21.1 | 0                   | 484  |
| pclt_ncRNA_160 | 1507 | pqer_ncRNA_153 | 74.3 | 20.2 | <10 <sup>-51</sup>  | 230  |
| pclt_ncRNA_128 | 1405 | pqer_ncRNA_131 | 85.2 | 18.8 | <10 <sup>-82</sup>  | 200  |

|                |      |                |      |      |                    |     |
|----------------|------|----------------|------|------|--------------------|-----|
| pclt_ncRNA_115 | 1384 | pqer_ncRNA_118 | 83.9 | 18.8 | <10 <sup>-73</sup> | 276 |
| pclt_ncRNA_95  | 1361 | none           |      |      |                    | 189 |
| pclt_ncRNA_122 | 1565 | none           |      |      |                    | 144 |
| pclt_ncRNA_69  | 1623 | none           |      |      |                    | 139 |
| pclt_ncRNA_68  | 2508 | none           |      |      |                    | 207 |
| pclt_ncRNA_147 | 1899 | none           |      |      |                    | 153 |
| pclt_ncRNA_35  | 234  | none           |      |      |                    | 235 |
| pclt_ncRNA_99  | 643  | none           |      |      |                    | 376 |
| pclt_ncRNA_85  | 484  | none           |      |      |                    | 277 |
| pclt_ncRNA_131 | 1933 | none           |      |      |                    | 247 |
| pclt_ncRNA_162 | 325  | none           |      |      |                    | 587 |
| pclt_ncRNA_62  | 399  | none           |      |      |                    | 301 |
| pclt_ncRNA_108 | 808  | none           |      |      |                    | 136 |
| pclt_ncRNA_55  | 568  | none           |      |      |                    | 183 |
| pclt_ncRNA_130 | 593  | none           |      |      |                    | 466 |
| pclt_ncRNA_29  | 3016 | none           |      |      |                    | 400 |
| pclt_ncRNA_84  | 436  | none           |      |      |                    | 193 |
| pclt_ncRNA_61  | 725  | none           |      |      |                    | 167 |
| pclt_ncRNA_42  | 782  | none           |      |      |                    | 194 |
| pclt_ncRNA_136 | 753  | none           |      |      |                    | 238 |
| pclt_ncRNA_87  | 367  | none           |      |      |                    | 166 |
| pclt_ncRNA_132 | 1582 | none           |      |      |                    | 357 |
| pclt_ncRNA_107 | 1466 | none           |      |      |                    | 332 |
| pclt_ncRNA_39  | 978  | none           |      |      |                    | 274 |
| pclt_ncRNA_119 | 1477 | none           |      |      |                    | 390 |
| pclt_ncRNA_49  | 750  | none           |      |      |                    | 230 |
| pclt_ncRNA_117 | 1518 | none           |      |      |                    | 344 |
| pclt_ncRNA_40  | 803  | none           |      |      |                    | 132 |
| pclt_ncRNA_64  | 732  | none           |      |      |                    | 235 |
| pclt_ncRNA_26  | 581  | none           |      |      |                    | 194 |
| pclt_ncRNA_48  | 643  | none           |      |      |                    | 184 |
| pclt_ncRNA_142 | 644  | none           |      |      |                    | 222 |
| pclt_ncRNA_63  | 949  | none           |      |      |                    | 297 |
| pclt_ncRNA_141 | 1593 | none           |      |      |                    | 674 |
| pclt_ncRNA_96  | 1319 | none           |      |      |                    | 223 |
| pclt_ncRNA_157 | 954  | none           |      |      |                    | 206 |
| pclt_ncRNA_86  | 681  | none           |      |      |                    | 200 |
| pclt_ncRNA_110 | 874  | none           |      |      |                    | 352 |
| pclt_ncRNA_118 | 989  | none           |      |      |                    | 328 |
| pclt_ncRNA_38  | 891  | none           |      |      |                    | 277 |
| pclt_ncRNA_2   | 1683 | none           |      |      |                    | 271 |
| pclt_ncRNA_11  | 727  | none           |      |      |                    | 92  |
| pclt_ncRNA_82  | 1363 | none           |      |      |                    | 332 |
| pclt_ncRNA_66  | 661  | none           |      |      |                    | 317 |
| pclt_ncRNA_37  | 909  | none           |      |      |                    | 172 |
| pclt_ncRNA_51  | 1389 | none           |      |      |                    | 310 |

|                |      |      |  |  |  |     |
|----------------|------|------|--|--|--|-----|
| pclt_ncRNA_44  | 915  | none |  |  |  | 343 |
| pclt_ncRNA_139 | 1580 | none |  |  |  | 165 |
| pclt_ncRNA_127 | 1071 | none |  |  |  | 262 |
| pclt_ncRNA_12  | 1786 | none |  |  |  | 222 |
| pclt_ncRNA_75  | 1435 | none |  |  |  | 218 |
| pclt_ncRNA_22  | 903  | none |  |  |  | 189 |
| pclt_ncRNA_71  | 1037 | none |  |  |  | 250 |
| pclt_ncRNA_52  | 1249 | none |  |  |  | 160 |
| pclt_ncRNA_126 | 935  | none |  |  |  | 207 |
| pclt_ncRNA_140 | 1627 | none |  |  |  | 169 |
| pclt_ncRNA_73  | 794  | none |  |  |  | 240 |
| pclt_ncRNA_163 | 1992 | none |  |  |  | 236 |
| pclt_ncRNA_80  | 1113 | none |  |  |  | 574 |
| pclt_ncRNA_135 | 1174 | none |  |  |  | 196 |
| pclt_ncRNA_111 | 1244 | none |  |  |  | 389 |
| pclt_ncRNA_50  | 1550 | none |  |  |  | 172 |
| pclt_ncRNA_154 | 1378 | none |  |  |  | 133 |
| pclt_ncRNA_8   | 1095 | none |  |  |  | 319 |
| pclt_ncRNA_27  | 2220 | none |  |  |  | 816 |
| pclt_ncRNA_19  | 1935 | none |  |  |  | 278 |
| pclt_ncRNA_151 | 1453 | none |  |  |  | 226 |
| pclt_ncRNA_76  | 1863 | none |  |  |  | 130 |
| pclt_ncRNA_56  | 2488 | none |  |  |  | 229 |
| pclt_ncRNA_1   | 1646 | none |  |  |  | 391 |
| pclt_ncRNA_21  | 2922 | none |  |  |  | 100 |
| pclt_ncRNA_33  | 1821 | none |  |  |  | 659 |
| pclt_ncRNA_81  | 2228 | none |  |  |  | 888 |
| pclt_ncRNA_148 | 1849 | none |  |  |  | 355 |
| pclt_ncRNA_79  | 2325 | none |  |  |  | 226 |

The predicted *P. celtis* ncRNA genes were compared to *P. quercus* genome sequence using BlastN. Previously annotated *P. quercus* ncRNA genes overlapping with each best matching genomic positions were defined as homologous (column 3) to the corresponding *P. celtis* ncRNA genes. The transcript size is given in column 2. The overlap size and % identity are given in columns 4 and 5 (if applicable). As all ncRNA homologs originate from two closely related genomes, strong sequence similarities may not imply the conservation of a function (if any). Most of ncRNAs are antisense to a protein-coding gene except for 7 of them (grey-filled rows) that are mostly intergenic. A little more than half (87/161=54%) of the predicted *P. celtis* ncRNA genes exhibit a homolog in *P. quercus*.

## Supplementary Figures S1-S3

### **Figure S1.**

**TEM image of an ultrathin section of *p. celtis* and *p. quercus* viral particles.** The structures of the particles of the other Pandoraviridae strains do not exhibit any noticeable difference.

*Pandoravirus celtis*

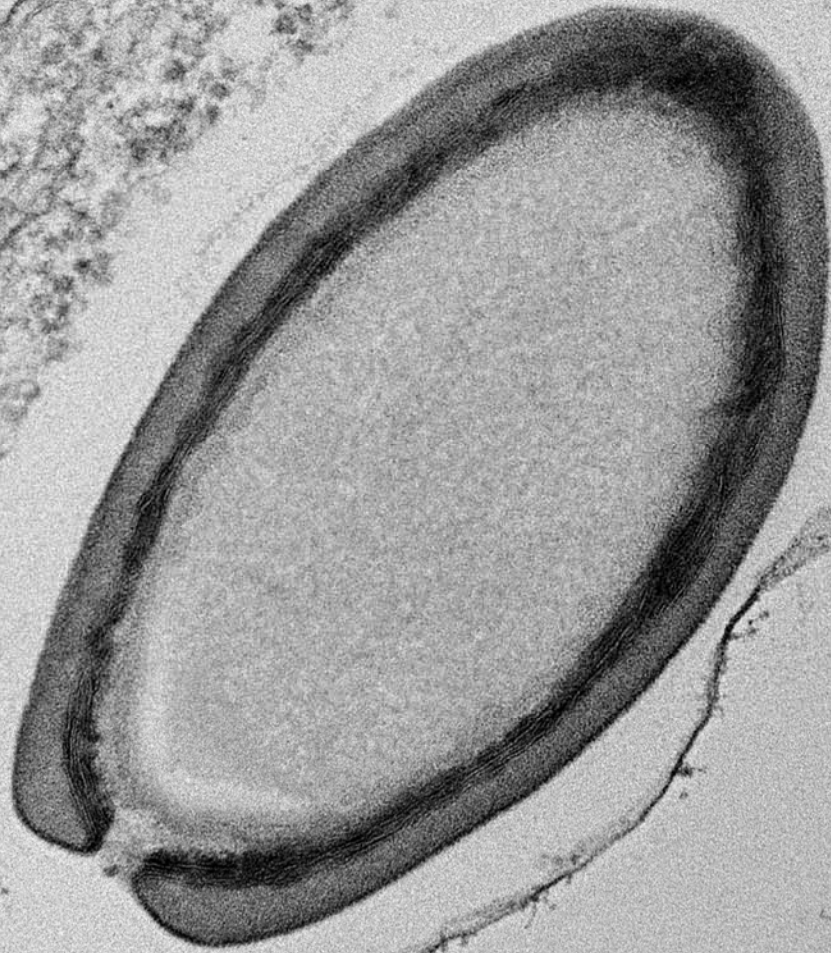

200 nm

*Pandoravirus quercus*

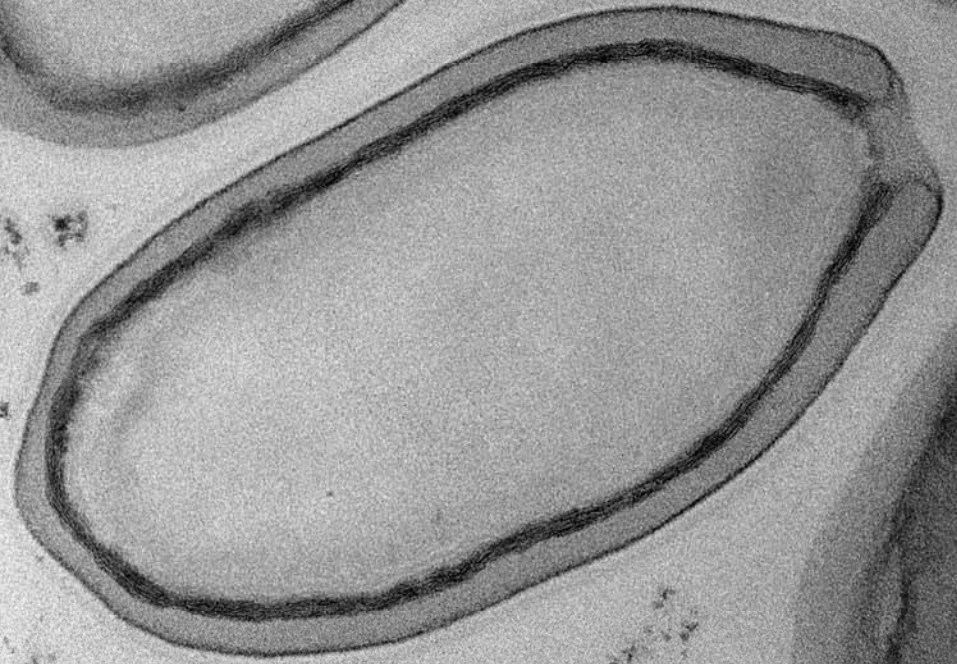

200 nm

## **Figure S2.**

**Details of the *p. celtis*' hAT transposons. Details of the S0, S1, and S2 segments highlighted in Fig. 2.** The genomic coordinates of the transposons in *p. celtis* (horizontal) and their homologous locations in *p. quercus* (vertical) are indicated. The cognate *p. celtis*' transposase gene name and its approximate location is indicated for each transposon. Other genes are not represented. Homologous segments are missing in *p. quercus* for S0 and S2 (See the Results section). The sequences of the transposon boundaries are shown above the dot-plots. The TIRs (Terminally Inverted Repeats) are highlighted in black. Conserved TIRs and TSDs (Target Site Duplications) are depicted using arrows.

S0\_transposon **TAACGCTGGGCAA**CGGCTAGCCGGCTCGGTCCTGGCTAAGGGTCGGACTAACC . . . AAAATGTGGCGGCTAGCCGGCTAGCCGGCTTACGCGTAGCCAT**T-GCCCAGCGTTA**  
 S1\_transposon **TAATGCT**GGTCAACGGCCAGCCGGCCAGGGCCGGCCATTTTGAACGGGCC . . . CAAAATCTGCGGCCAGCCGGCCAGCCGCTAAGCCACGGGCCATTGGCAC**AGCATTAA**  
 S2\_transposon **TAACGCTGGGCAACGGCT**AGCCGGCTCGGTCCTGGCTAAGGGTCGGACTAACC . . . AACAGGTGGCGGCTAGCCGGTTAGCCGGCTAACGGTGA**GCCGTT-GCCCAGCGTTA**

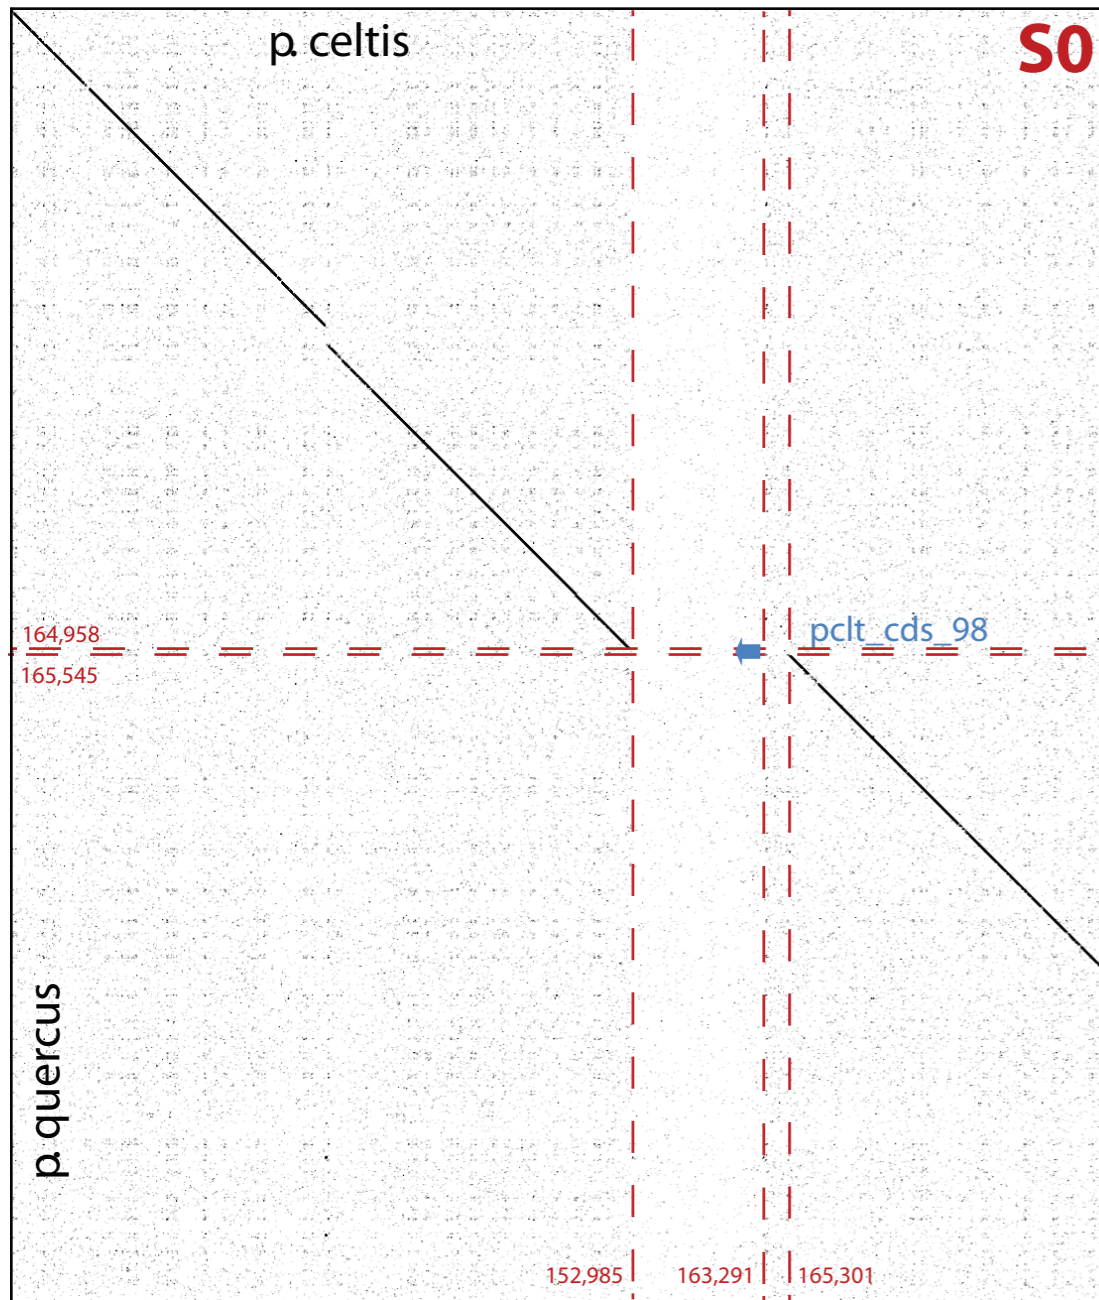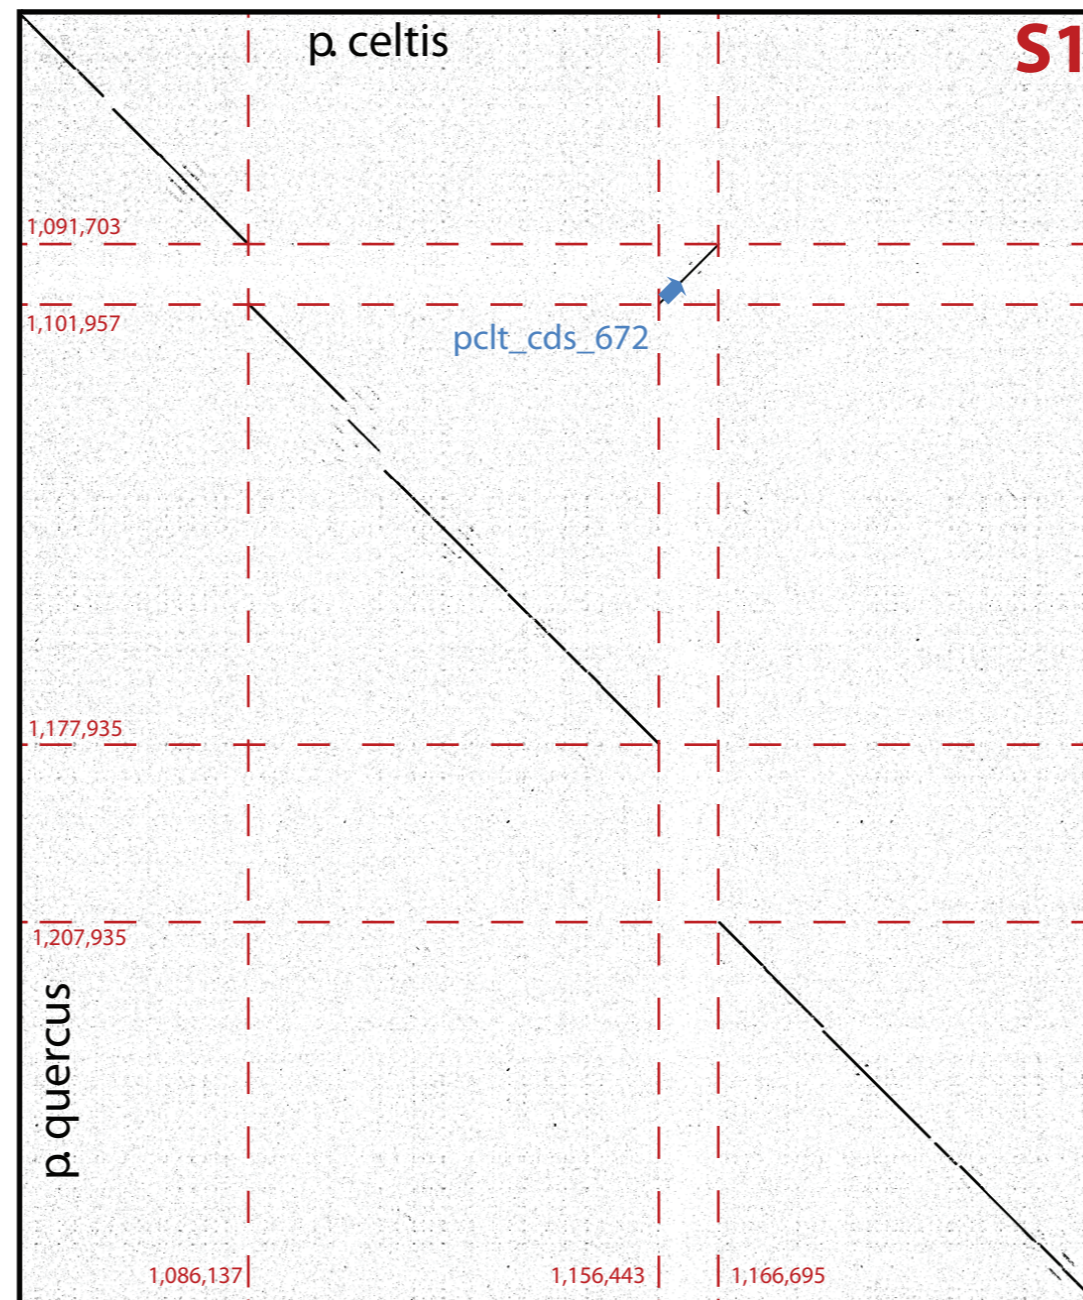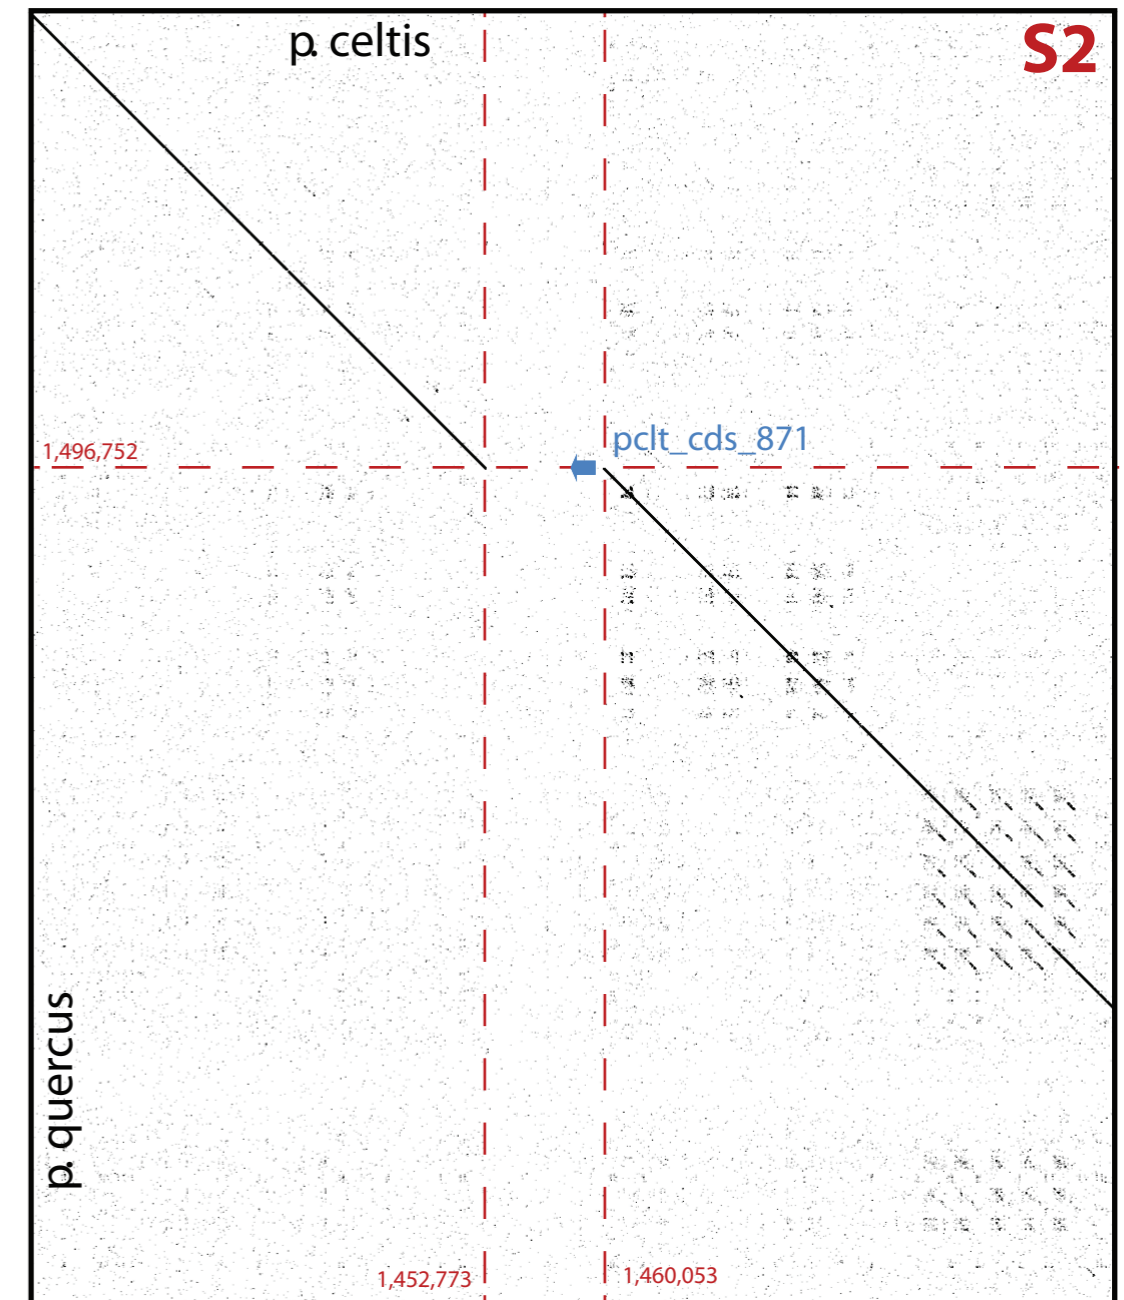



### **Figure S3.**

**Details of two tandem repeat clusters of fascin-domain containing genes.** See the Results section for comments. The dot-plot (horizontal: *p. celtis*, vertical: *p. quercus*) and the corresponding phylogenetic tree of the multiple paralogs illustrate the well-ordered dynamics of this highly repeated regions, alternating expansion, deletions and pseudogenization. For instance, we noticed the presence of two alleles of the *pclt\_886* proteins in our initial sequence data. The minor one (482 residues, used in this tree) is 96.7% identical to its *pqer\_868* homolog, while the major one results into a smaller protein (363 residues) diverging after the first 125 residues due to the presence of 4 indels in the rest of the gene. The evolutionary history of the fascin-domain containing proteins was inferred using the Neighbor-Joining method as implemented in Mega (Kumar S, et al. (2018) MEGA X: Molecular Evolutionary Genetics Analysis across computing platforms. *Mol. Biol. Evol.* 35:1547-1549.). The evolutionary distances were computed using the Poisson correction method. The analysis involved 31 amino acid sequences. All positions containing gaps and missing data were eliminated. There were 323 positions in the final dataset.

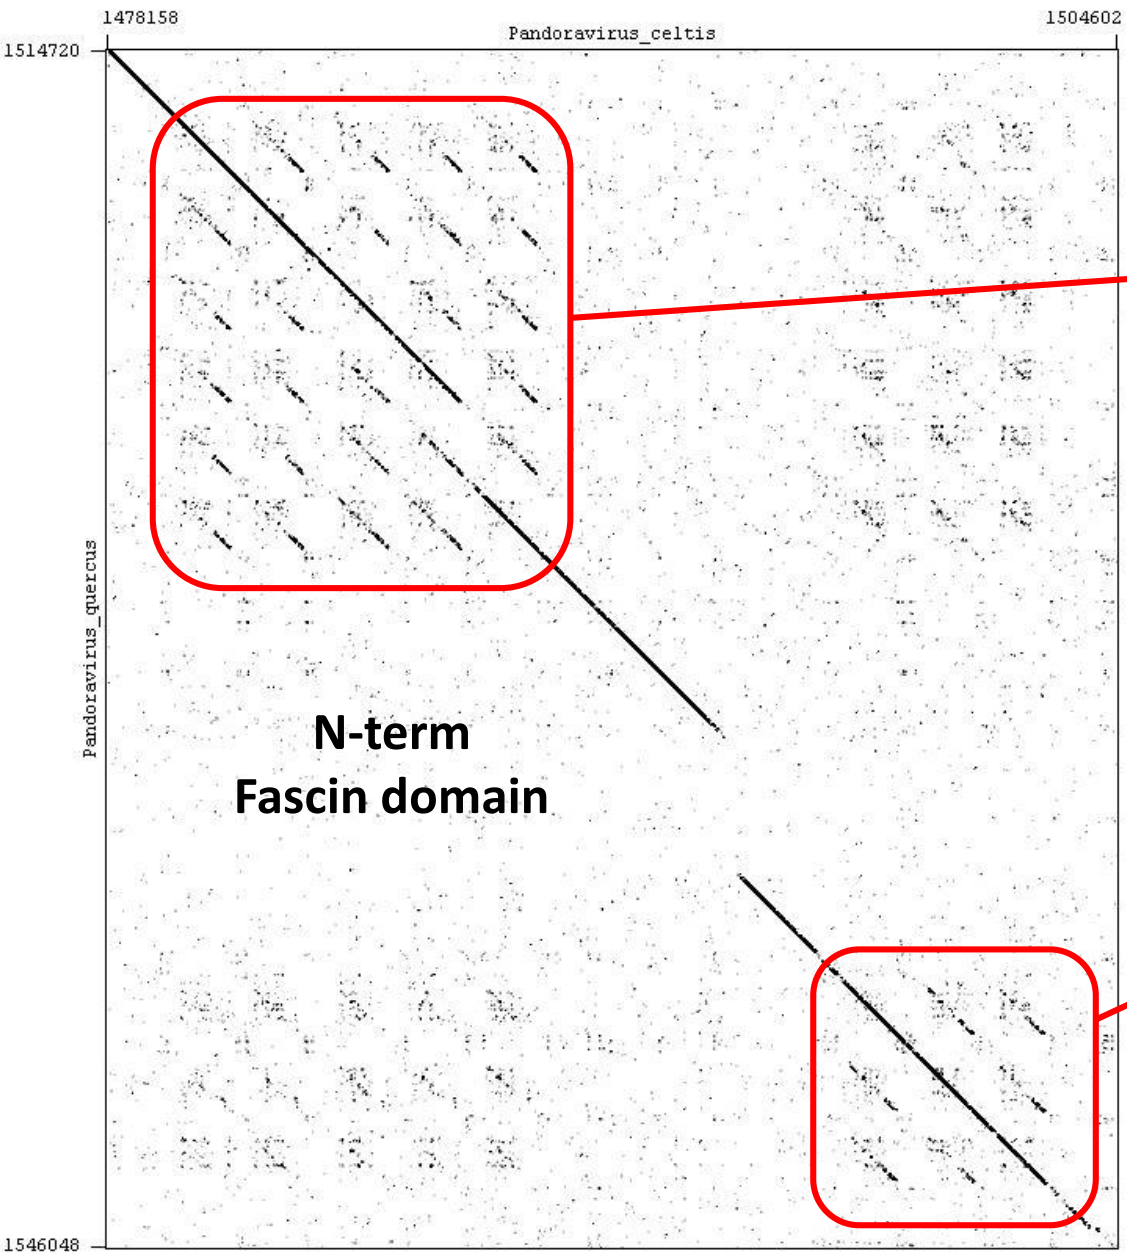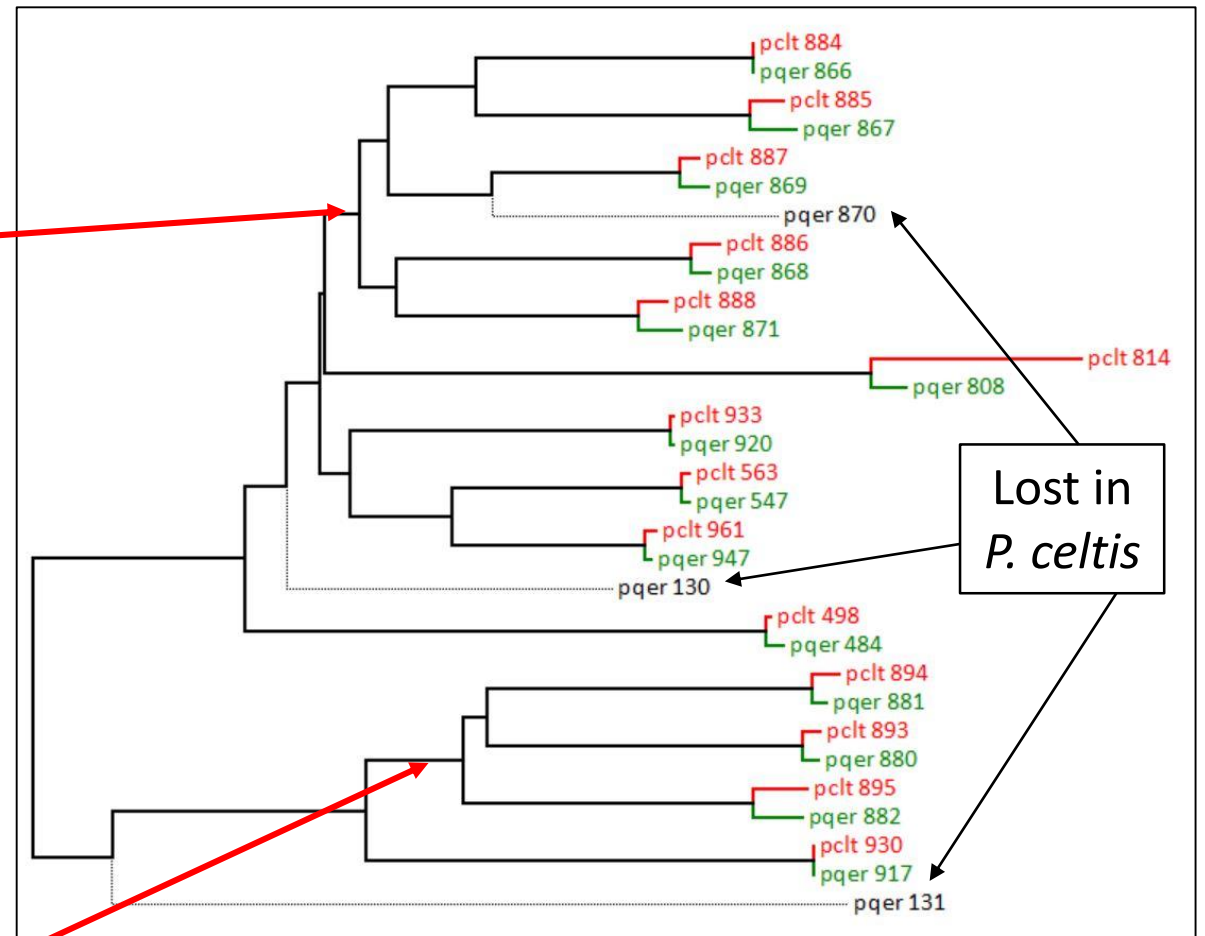

Supplement: Data_Sheet_1.pdf [file Data_Sheet_1.pdf]
